# Supplementary material for: Overexpression of the VRK1 kinase, which is associated with breast cancer, induces a mesenchymal to epithelial transition in mammary epithelial cells
Source: PubMed Central journal article supplement (PMC6122820; doi:10.1371/journal.pone.0203397), 2018-09-04

Figure S3

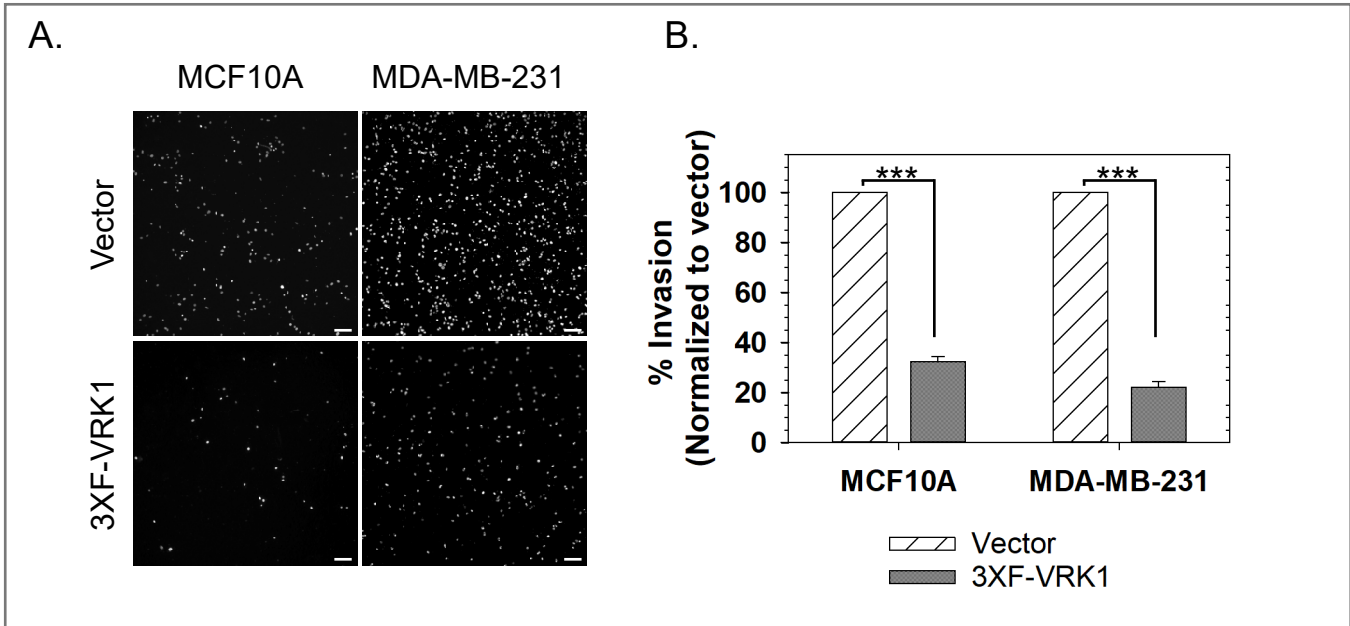

Supplement: pone.0203397.s004.pdf [file pone.0203397.s004.pdf]
